# Supplementary material for: Structural, Spectroscopic, and Thermal Decomposition Features of [Carbonatotetraamminecobalt(III)] Iodide—Insight into the Simultaneous Solid-Phase Quasi-Intramolecular Redox Reactions
Source: MDPI journal article supplement (doi:10.3390/inorganics11020068), 2023-02-01
Supplement: s1 [file s1]

# Electronic Supplementary Material

## Structural, Spectroscopic, and Thermal Decomposition Features of [Carbonatotetraamminecobalt(III)] Iodide – Insight into the Simultaneous Solid-phase Quasi-intramolecular Redox Reactions

Kende Attila Béres<sup>1,2,\*</sup>, Fanni Szilágyi<sup>3</sup>, Zoltán Homonnay,<sup>2</sup> Zsolt Dürvanger<sup>4,5</sup>, Laura Bereczki,<sup>1</sup> László Trif,<sup>1</sup> Vladimir M. Petruševski<sup>6</sup>, Attila Farkas<sup>7</sup>, Niloofar Bayat,<sup>1,8</sup> and László Kótai<sup>1,9,\*</sup>

<sup>1</sup>Institute of Materials and Environmental Chemistry, Research Centre for Natural Sciences, Magyar Tudósok krt. 2., H-1117 Budapest, Hungary;

<sup>2</sup>György Hevesy PhD School of Chemistry, Institute of Chemistry, ELTE Eötvös Loránd University, Pázmány Péter s. 1/A, H-1117 Budapest, Hungary

<sup>3</sup>Bay Zoltan Ltd. for Applied Research, Production Division (BAY-PROD), 1 Kondorfa, Budapest 1116, Hungary

<sup>4</sup>ELKH-ELTE Protein Modelling Research Group, Pázmány Péter s. 1/A, H-1117 Budapest, Hungary

<sup>5</sup>Structural Chemistry and Biology Laboratory, Institute of Chemistry, ELTE Eötvös Loránd University, Pázmány Péter s. 1/A, H-1117 Budapest, Hungary

<sup>6</sup>Faculty of Natural Sciences and Mathematics, Ss. Cyril and Methodius University, Skopje, MK-1000, North Macedonia

<sup>7</sup>Department of Organic Chemistry and Technology, Faculty of Chemical Technology and Biotechnology,

Budapest University of Technology and Economics, Műegyetem rkp. 3., H-1111 Budapest, Hungary

<sup>8</sup>Department of Analytical and Inorganic Chemistry, Budapest University of Technology and Economics, Műegyetem rakpart 3, 1111 Budapest, Hungary

<sup>9</sup>Deuton-X Ltd., Selmeci u. 89, H-2030, Érd, Hungary

\*Correspondence: [beres.kende.attila@ttk.hu](mailto:beres.kende.attila@ttk.hu), [kotai.laszlo@ttk.hu](mailto:kotai.laszlo@ttk.hu)

**Table S1.** Crystal data and structure refinement details of [Co(NH<sub>3</sub>)<sub>4</sub>CO<sub>3</sub>].

|                                                             |                                                                                                                             |
|-------------------------------------------------------------|-----------------------------------------------------------------------------------------------------------------------------|
| Empirical formula                                           | C H <sub>12</sub> Co I N <sub>4</sub> O <sub>3</sub>                                                                        |
| Formula weight                                              | 313.98                                                                                                                      |
| Temperature                                                 | 303.46(10)                                                                                                                  |
| Radiation and wavelength                                    | Cu-K $\alpha$ , $\lambda$ =1.54184Å                                                                                         |
| Crystal system                                              | orthorhombic                                                                                                                |
| Space group                                                 | <i>P</i> n m a                                                                                                              |
| Unit cell dimensions                                        | <i>a</i> =17.7359(2)Å<br><i>b</i> =7.77940(10)Å<br><i>c</i> =6.82520(10)Å<br>$\alpha$ =90°<br>$\beta$ =90°<br>$\gamma$ =90° |
| Volume                                                      | 941.70(2)Å <sup>3</sup>                                                                                                     |
| Z                                                           | 4                                                                                                                           |
| Density (calculated)                                        | 2.215 Mg/m <sup>3</sup>                                                                                                     |
| Absorption coefficient, $\mu$                               | 39.827 mm <sup>-1</sup>                                                                                                     |
| <i>F</i> (000)                                              | 600                                                                                                                         |
| Crystal colour                                              | purple                                                                                                                      |
| Crystal description                                         | needle                                                                                                                      |
| Crystal size                                                | 0.120 x 0.060 x 0.040 mm                                                                                                    |
| Absorption correction                                       | analytical                                                                                                                  |
| Max. and min. transmission                                  | 0.0650.502                                                                                                                  |
| $\theta$ -range for data collection                         | 4.987 $\leq \theta \leq$ 75.404°                                                                                            |
| Index ranges                                                | -22 $\leq h \leq$ 22; -9 $\leq k \leq$ 9; -8 $\leq l \leq$ 8                                                                |
| Reflections collected                                       | 22097                                                                                                                       |
| Completeness to 2 $\theta$                                  | 1.000                                                                                                                       |
| Independent reflections                                     | 1046 [ <i>R</i> (int) =0.0666]                                                                                              |
| Reflections <i>I</i> >2 $\sigma$ ( <i>I</i> )               | 1009                                                                                                                        |
| Refinement method                                           | full-matrix least-squares on <i>F</i> <sup>2</sup>                                                                          |
| Data / restraints / parameters                              | 1046 /0 /56                                                                                                                 |
| Goodness-of-fit on <i>F</i> <sup>2</sup>                    | 1.141                                                                                                                       |
| Final <i>R</i> indices [ <i>I</i> >2 $\sigma$ ( <i>I</i> )] | <i>R</i> 1 =0.0314, <i>wR</i> 2 =0.0761                                                                                     |
| <i>R</i> indices (all data)                                 | <i>R</i> 1 =0.0328, <i>wR</i> 2 =0.0769                                                                                     |
| Max. and mean shift/esd                                     | 0.000;0.000                                                                                                                 |
| Largest diff. peak and hole                                 | 1.331;-0.438 e.Å <sup>-3</sup>                                                                                              |

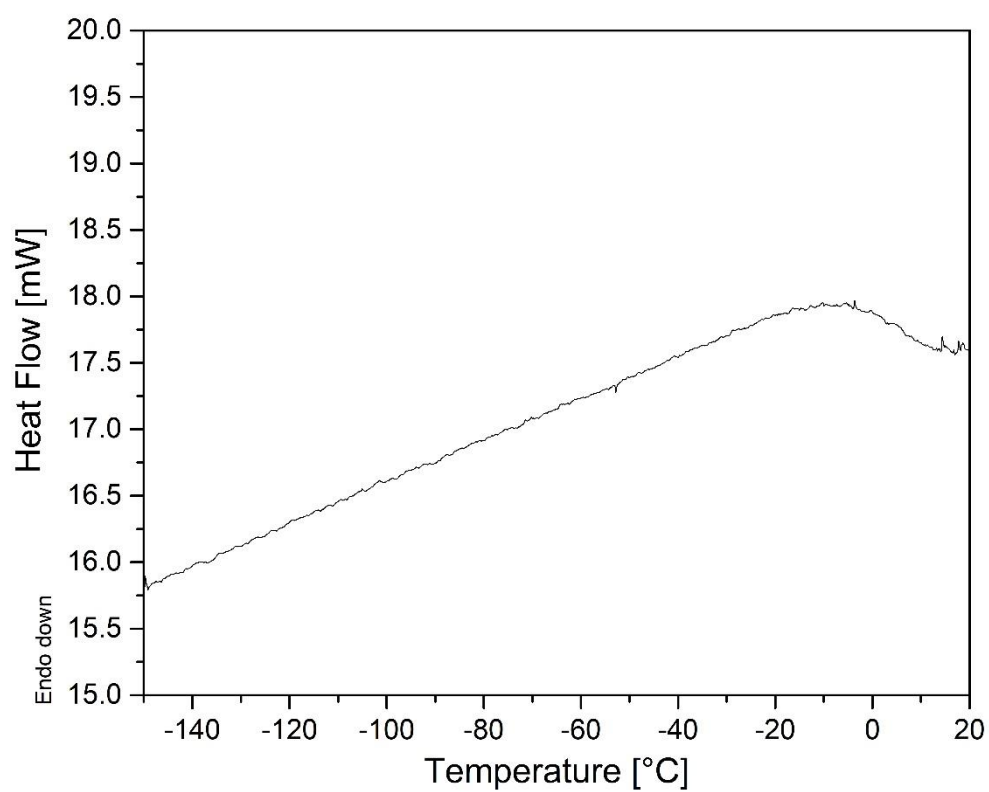

**Figure S1.** DSC results of compound **1** between -150 °C and room temperature.

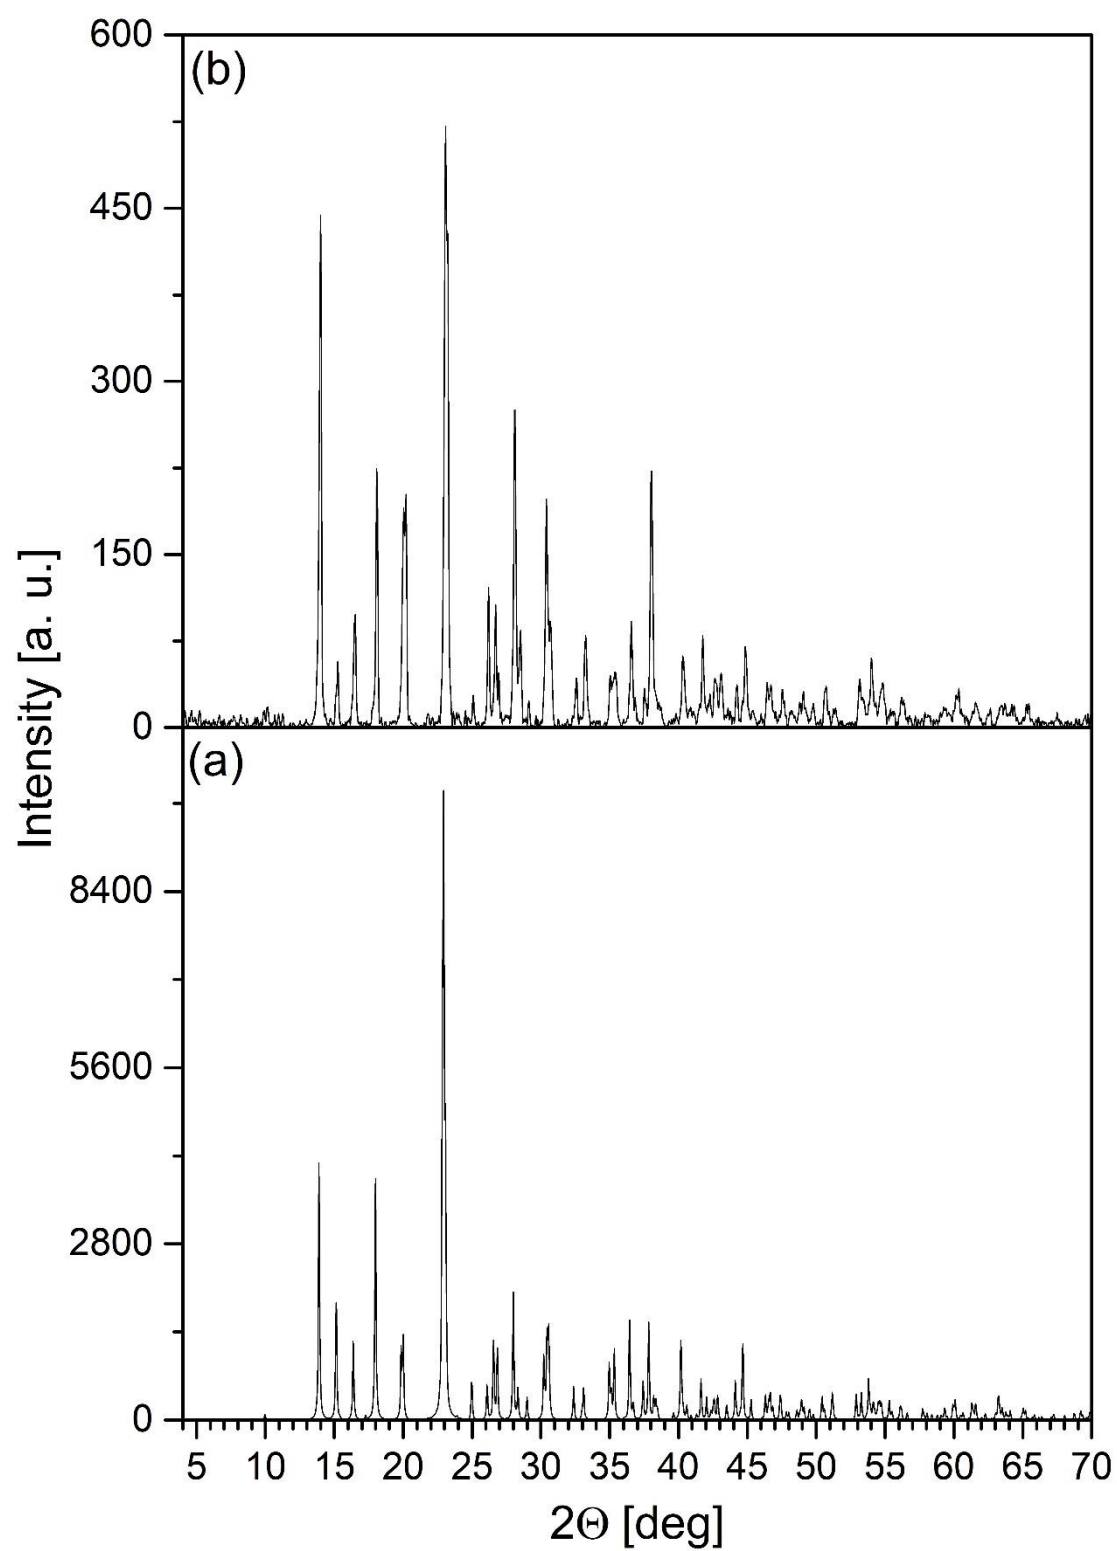

**Figure S2.** (a) The calculated (from SXRD data) and (b) the experimental powder X-ray diffractogram of compound 1.

**Table S2.** Bonds lengths in the crystal structure of [Co(NH<sub>3</sub>)<sub>4</sub>CO<sub>3</sub>]I (Symmetry codes to generate equivalent atoms: 1. [8\_565] x,-y-1/2+1,z).

|          |          |         |          |
|----------|----------|---------|----------|
| Co1-O2#1 | 1.917(2) | Co1-O2  | 1.917(2) |
| Co1-N2   | 1.953(4) | Co1-N3  | 1.957(5) |
| Co1-N1#1 | 1.959(3) | Co1-N1  | 1.959(3) |
| Co1-C1   | 2.325(5) | C1-O1   | 1.227(6) |
| C1-O2    | 1.308(4) | C1-O2#1 | 1.308(4) |

**Table S3.** Bonds angles in the crystal structure of [Co(NH<sub>3</sub>)<sub>4</sub>CO<sub>3</sub>]I (Symmetry codes to generate equivalent atoms: 1. [8\_565] x,-y-1/2+1,z).

|               |          |             |          |
|---------------|----------|-------------|----------|
| O2#1-Co1-O2   | 68.4(2)  | O2#1-Co1-N2 | 90.1(1)  |
| O2-Co1-N2     | 90.1(1)  | O2#1-Co1-N3 | 89.5(1)  |
| O2-Co1-N3     | 89.5(1)  | N2-Co1-N3   | 179.5(2) |
| O2#1-Co1-N1#1 | 167.0(1) | O2-Co1-N1#1 | 98.6(1)  |
| N2-Co1-N1#1   | 89.3(1)  | N3-Co1-N1#1 | 91.1(1)  |
| O2#1-Co1-N1   | 98.6(1)  | O2-Co1-N1   | 167.0(1) |
| N2-Co1-N1     | 89.3(1)  | N3-Co1-N1   | 91.1(1)  |
| N1#1-Co1-N1   | 94.4(2)  | O2#1-Co1-C1 | 34.22(8) |
| O2-Co1-C1     | 34.22(8) | N2-Co1-C1   | 88.7(2)  |
| N3-Co1-C1     | 90.8(2)  | N1#1-Co1-C1 | 132.7(1) |
| N1-Co1-C1     | 132.7(1) | O1-C1-O2    | 124.5(2) |
| O1-C1-O2#1    | 124.5(2) | O2-C1-O2#1  | 111.0(4) |
| O1-C1-Co1     | 175.2(4) | O2-C1-Co1   | 55.5(2)  |
| O2#1-C1-Co1   | 55.5(2)  | C1-O2-Co1   | 90.2(2)  |

**Table S4.** Analysis of Potential Hydrogen Bonds and Schemes with  $d(D...A) < R(D)+R(A)+0.50$ ,  $d(H...A) < R(H)+R(A)-0.12$  Ang.,  $D-H...A > 100.0$  Deg.

| D-H...A |        |      | D-H (Å) | H...A (Å) | D...A (Å) | D - H...A(°) | Symmetry operator |
|---------|--------|------|---------|-----------|-----------|--------------|-------------------|
| N1      | --H1AC | ..O1 | 0.89    | 2.35      | 3.038(4)  | 135          | x,y,1+z           |
| N1      | --H1AA | ..O1 | 0.89    | 2.42      | 3.276(4)  | 163          | 1-x,1/2+y,1-z     |
| N1      | --H1AB | ..I1 | 0.89    | 2.98      | 3.733(3)  | 144          | x,y,z             |
|         |        |      |         |           |           |              |                   |
| N2      | --H2A  | ..O2 | 0.89    | 2.14      | 2.953(3)  | 152          | 1-x,-y,1-z        |
| N2      | --H2B  | ..O1 | 0.89    | 2.16      | 3.004(5)  | 160          | x,y,1+z           |
| N3      | --H3B  | ..I1 | 0.91    | 2.88      | 3.761(5)  | 164          | 3/2-x,1-y,1/2+z   |

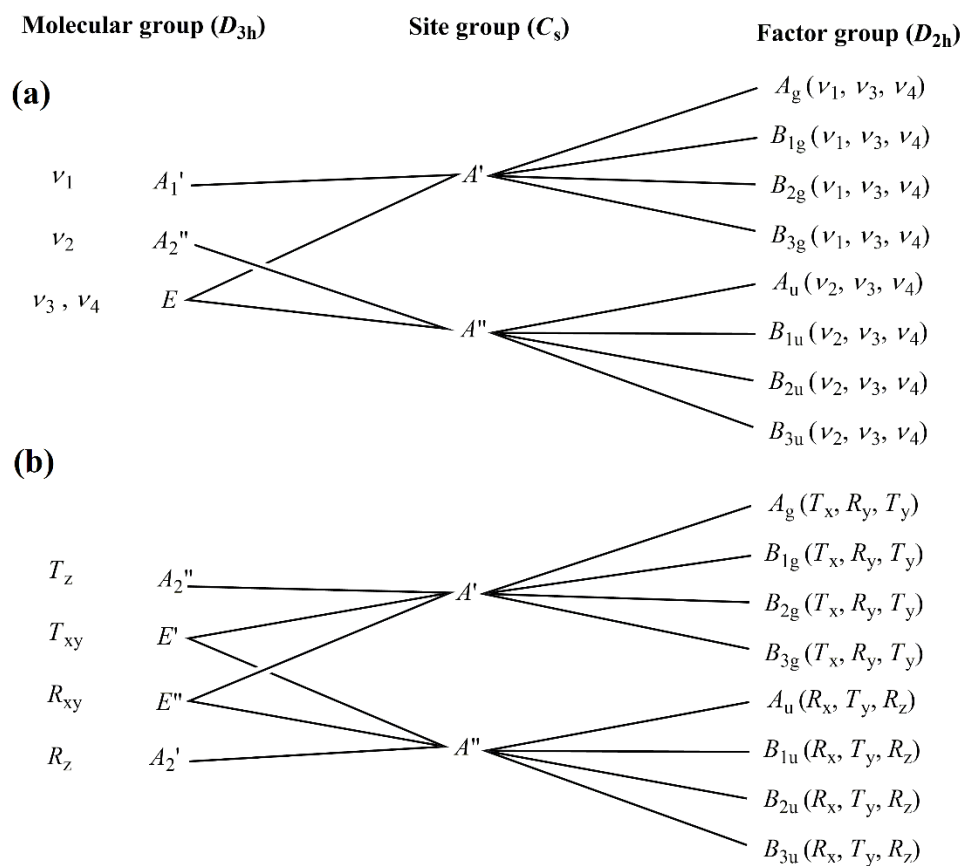

**Figure S3.** Factor group analysis of **(a)** internal and **(b)** external  $\text{CO}_3^{2-}$  modes in  $[\text{Co}(\text{NH}_3)_4\text{CO}_3]\text{I}$ .



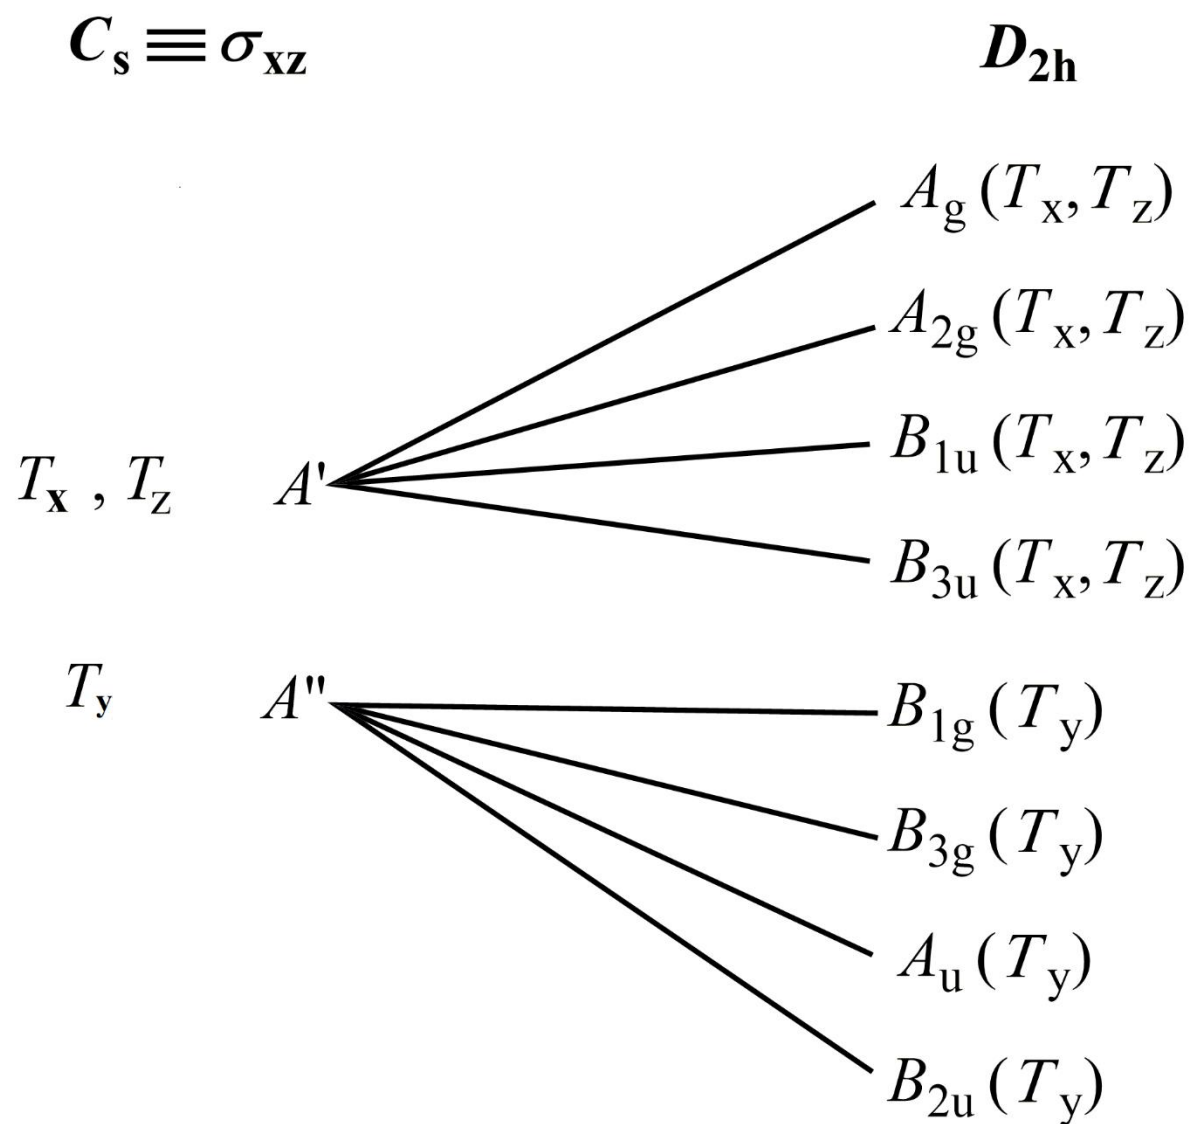

**Figure S4.** Factor group analysis of hindered translations of monoatomic structural motifs ( $\text{Co}^{3+}$  or  $\text{I}^-$ ) in  $[\text{Co}(\text{NH}_3)_4\text{CO}_3]\text{I}$ .

**Table S5.** The internal vibrational modes of the cis-O<sub>2</sub>CoN<sub>4</sub> skeleton and their assignments in the far-IR and Raman spectra of compound **1** (assuming effective C<sub>2v</sub> symmetry of the skeleton).

| Species        | Band            | Measured, cm <sup>-1</sup> |      |                | Calculated, cm <sup>-1</sup> | Assignment            |
|----------------|-----------------|----------------------------|------|----------------|------------------------------|-----------------------|
|                |                 | Far-IR                     |      | Raman (785 nm) |                              |                       |
|                |                 | Our                        | [42] | Our            | [42]                         |                       |
| A <sub>1</sub> | v <sub>1</sub>  | 545                        | 524  | 506            | 527                          | v <sub>CoN</sub>      |
|                | v <sub>2</sub>  | 430                        | 430  | 439            | 430                          | v <sub>CoN</sub>      |
|                | v <sub>3</sub>  | 293                        | 300  | 300            | 308                          | δ                     |
|                | v <sub>4</sub>  | 133sh                      | 148  | 155            | 149                          | δ                     |
|                | v <sub>5</sub>  | -                          | -    | -              | 38                           | δ                     |
|                | v <sub>6</sub>  | 392                        | 392  | 397            | 396                          | v <sub>as</sub> (CoO) |
| B <sub>1</sub> | v <sub>9</sub>  | 490                        | 492  | 486            | 496                          | v <sub>CoN</sub>      |
|                | v <sub>10</sub> | 267                        | 278  | 299            | 273                          | δ                     |
|                | v <sub>11</sub> | -                          | 204  | -              | 201                          | δ                     |
| B <sub>2</sub> | v <sub>12</sub> | 430                        | 460  | 467            | 459                          | v <sub>CoN</sub>      |
|                | v <sub>13</sub> | -                          | 182  | 155            | 191                          | δ                     |
|                | v <sub>14</sub> | 325                        | 324  | 323            | 318                          | v <sub>s</sub> (CoO)  |
|                | v <sub>15</sub> | 120                        | 148  | 114            | 129                          | δ                     |

**Table S6.** The assignment of the ammonia vibrational modes in the IR and Raman spectra of compound **1** (classified under  $C_{3v}$  symmetry).

| Species        | Band           | Measured/cm <sup>-1</sup> |          |             |                        | Assignment            |
|----------------|----------------|---------------------------|----------|-------------|------------------------|-----------------------|
|                |                | IR, 25 °C                 |          |             | Raman, 532 nm, -150 °C |                       |
|                |                | [43].                     | [37]     | Our results | Our results            |                       |
| A <sub>1</sub> | v <sub>1</sub> | 3170                      | 3190     | 3174        | 3183                   | v <sub>s</sub> (NH)   |
|                | v <sub>2</sub> | 1318                      | 1314     | 1316        | 1314                   | δ <sub>s</sub> (HNH)  |
| E              | v <sub>3</sub> | 3290                      | 3290     | 3284,3219   | 3291, 3228             | v <sub>as</sub> (NH)  |
|                | v <sub>4</sub> | 1652                      | 1603     | 1665        | 1664                   | δ <sub>as</sub> (HNH) |
|                | v <sub>5</sub> | 820                       | 834, 825 | 817, 793sh  | 839, 818               | ρ(NH <sub>3</sub> )   |

**Table S7.** The relative Co-N donor bond strength in the amminecobalt iodide complexes.

| Compound                                        | $\delta_s(\text{HNH})$ , $\text{cm}^{-1}$ | Relative bond strength, in % | Ref. |
|-------------------------------------------------|-------------------------------------------|------------------------------|------|
| $[\text{Co}(\text{NH}_3)_4\text{CO}_3]\text{I}$ | 1316                                      | 0.84                         | [42] |
| $[\text{Co}(\text{NH}_3)_5\text{CO}_3]\text{I}$ | 1307                                      | 0.82                         | [42] |
| $[\text{Co}(\text{NH}_3)_6]\text{I}_3$          | 1323                                      | 0.86                         | [44] |

**Table S8.** The  $\kappa^2$ -O,O'-coordinated (chelate-forming) carbonate ion ( $C_{2v}$ ) vibrational modes and their assignments in compound **1** (a tentative  $C_{2v}$  symmetry of the coordinated carbonate anions was assumed).

| Species        | Band           | Measured/cm <sup>-1</sup> |                  |                         | Calculated values/cm <sup>-1</sup> [42] | Assignment                          |
|----------------|----------------|---------------------------|------------------|-------------------------|-----------------------------------------|-------------------------------------|
|                |                | IR [42]                   | IR (our results) | Raman (785 nm - 150 °C) |                                         |                                     |
| A <sub>1</sub> | v <sub>1</sub> | 1595                      | 1595             | 1617                    | 1577                                    | v <sub>as</sub> (C=O <sup>§</sup> ) |
|                | v <sub>2</sub> | 1044                      | 1045             | 1049                    | 1052                                    | v <sub>s</sub> (C-O)                |
|                | v <sub>3</sub> | 763                       | 761              | 763                     | 771                                     | δ(OCO), in-plane                    |
| B <sub>1</sub> | v <sub>4</sub> | 1284,1267                 | 1283,1263        | 1275sh, 1264            | 1274                                    | v <sub>as</sub> (CO)                |
|                | v <sub>5</sub> | 673,667                   | 672              |                         | 671                                     | δ(OCO <sup>§</sup> ), in-plane      |
| B <sub>2</sub> | v <sub>6</sub> | 840,834                   | 844sh, 831       |                         | 859                                     | π, out-of-plane                     |

<sup>§</sup>O means non-coordinated oxygen atom of carbonate ion

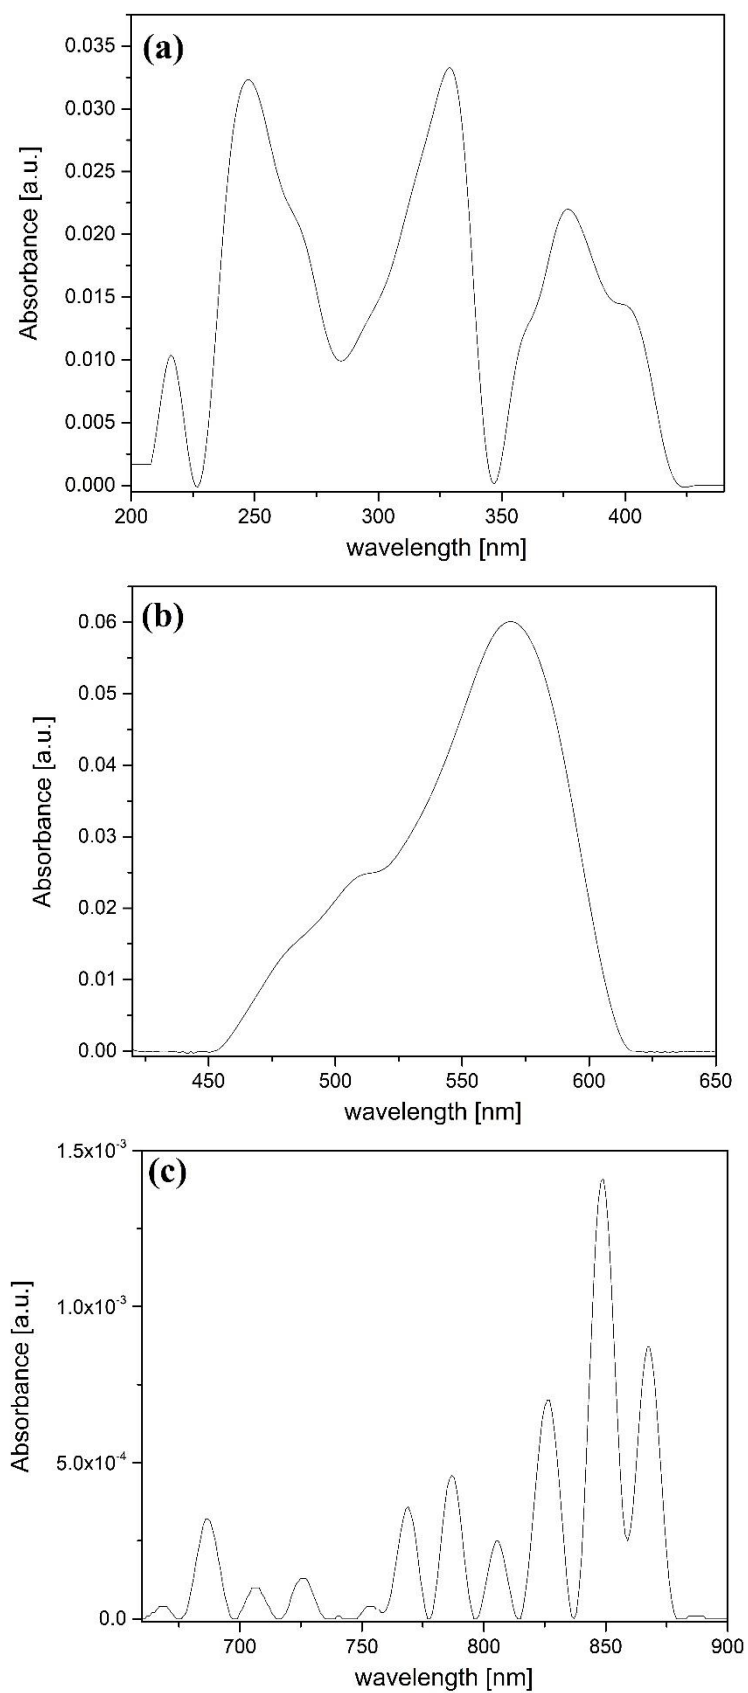

**Figure S5.** The UV-VIS spectra of compound **1** in **(a)** 200–440 nm range, **(b)** 420–650 nm range and **(c)** 660–900 nm range.

**Table S9.** Experimental UV–Vis data for compound **1**,  $[\text{Co}(\text{NH}_3)_4\text{CO}_3]_2\text{SO}_4 \cdot 3\text{H}_2\text{O}$ , and the calculated data for the  $[\text{Co}(\text{NH}_3)_4\text{CO}_3]^+$  ion

| Assignment                                                 | $\lambda_{\text{max}}$ ( in nm) |                                                |                                                                                     |
|------------------------------------------------------------|---------------------------------|------------------------------------------------|-------------------------------------------------------------------------------------|
|                                                            | Compound <b>1</b>               | $[\text{Co}(\text{NH}_3)_4\text{CO}_3]^+$ [43] | $[\text{Co}(\text{NH}_3)_4\text{CO}_3]_2\text{SO}_4 \cdot 3\text{H}_2\text{O}$ [23] |
| $^1\text{T}_{1\text{g}} \leftarrow ^1\text{A}_{1\text{g}}$ | 569                             | 519                                            | 537                                                                                 |
| $^1\text{T}_{2\text{g}} \leftarrow ^1\text{A}_{1\text{g}}$ | 377                             | 368                                            | 380                                                                                 |
| $^3\text{T}_{1\text{g}} \leftarrow ^1\text{A}_{1\text{g}}$ | 850                             | 845                                            | 834                                                                                 |
| $^3\text{T}_{2\text{g}} \leftarrow ^1\text{A}_{1\text{g}}$ | 687                             | 633                                            | 653                                                                                 |
| LMCT $\pi\text{-e}_{\text{g}}$                             | 246                             | -                                              | 300                                                                                 |

**Table S10.** The main parameters of the decomposition process of compound **1**.

| Parameter                      | Step | In inert atmosphere | In air atmosphere |
|--------------------------------|------|---------------------|-------------------|
| Peak temperatures (°C)         | 1A   | 209.9               | 210.6             |
|                                | 1B   |                     | 241.6             |
|                                | 2    | 575.4               | -                 |
| Weight loss (%)                | 1A   | 69.7                | 46.1              |
|                                | 1B   |                     | 30.1              |
|                                | 2    | 8.4                 | 2.0               |
| Summarized weight loss (%)     | 1-2  | 78.1                | 78.2              |
| Reaction heat (J/g)            | 1A   | 47.85               | 697.64            |
|                                | 1B   | -                   | -181.38           |
|                                | 2    | 37.00               | -                 |
| Summarized reaction heat (J/g) | 1-2  | 84.85               | 516.26            |



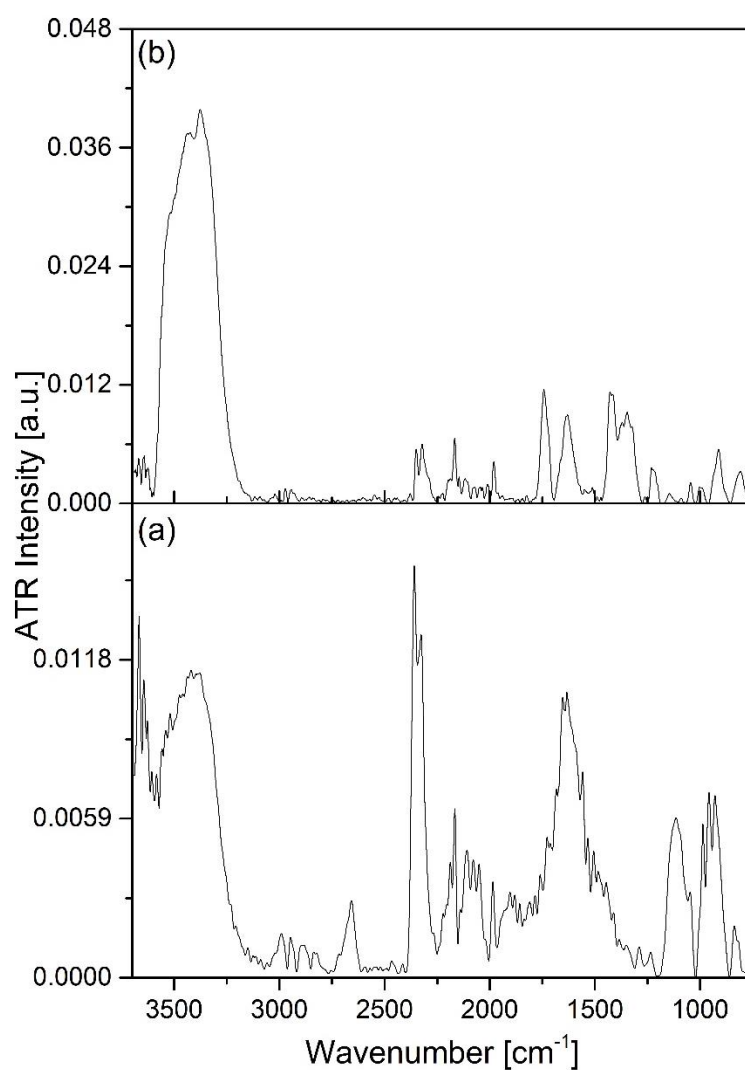

**Figure S6.** The IR spectrum of the decomposition intermediates formed at 300 °C in air, recorded in the range of 700-3700 cm<sup>-1</sup> (enlarged part of the IR spectra of the decomposition intermediates formed in He(a) and in air (b), in the N-H and -C(=O)-NH- groups absorption bands range).

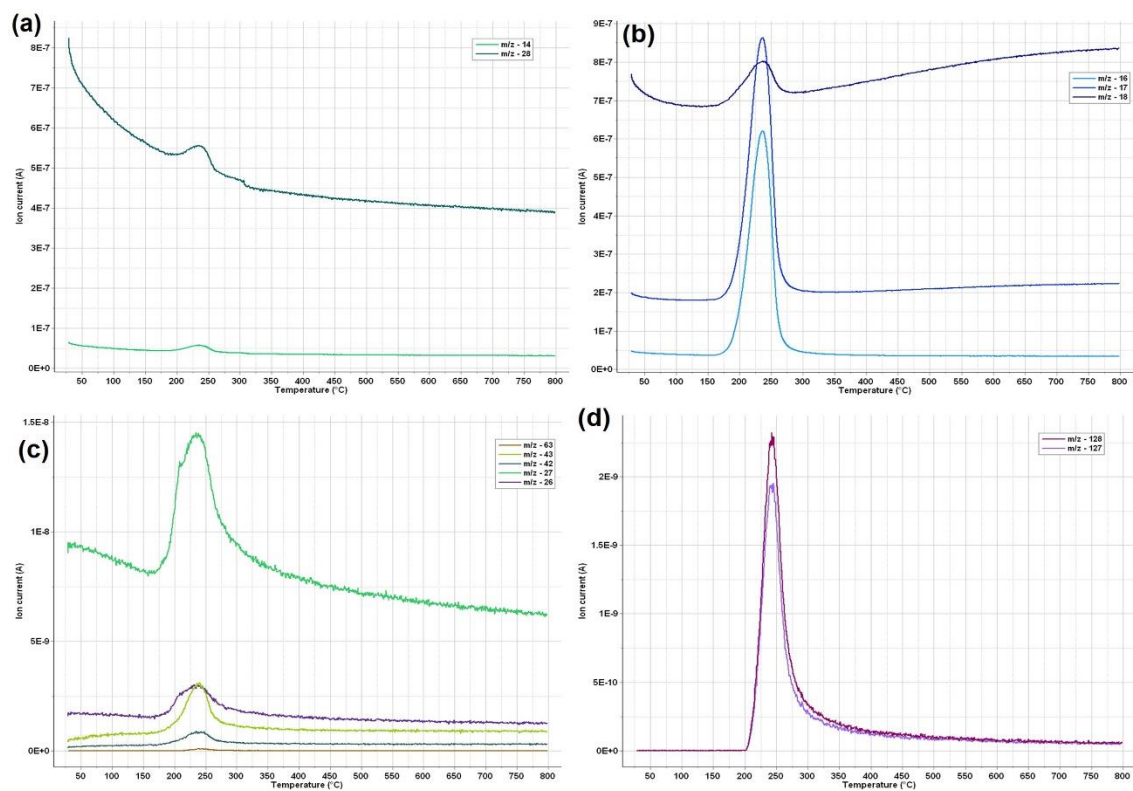

**Figure S7.** The TG-MS ion intensity curves for curves of  $m/z=14,15, 28, 30$  and  $44$  (a),  $m/z=15,16,17,$  and  $18$  (b),  $m/z= 26,27,42$  and  $43$  (c) and  $m/z= 127$  and  $128$  ions.

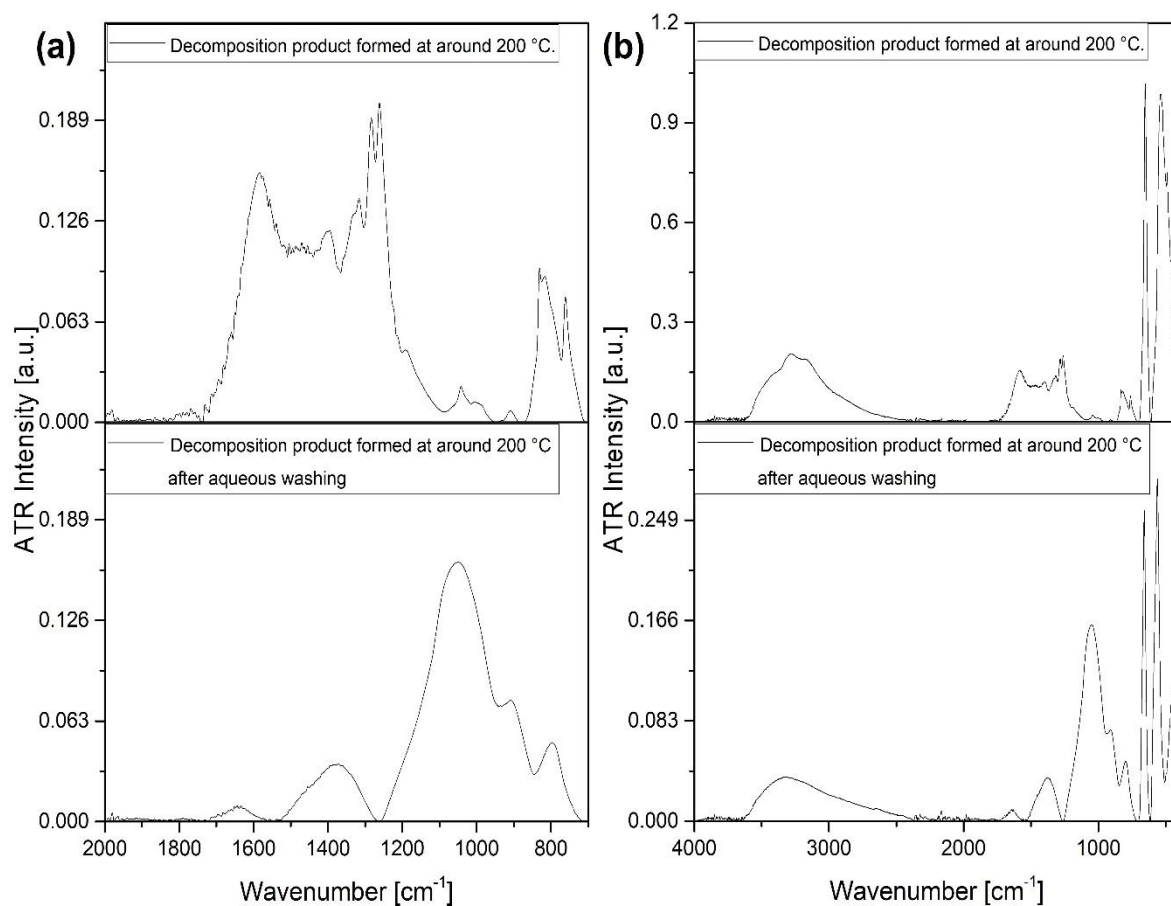

**Figure S8.** The IR spectra of the decomposition product of compound **1** formed under isotherm conditions at around  $\sim 200$  °C, **(a)** in range 2000 to 700  $\text{cm}^{-1}$  and **(b)** in range 4000 to 400  $\text{cm}^{-1}$ .

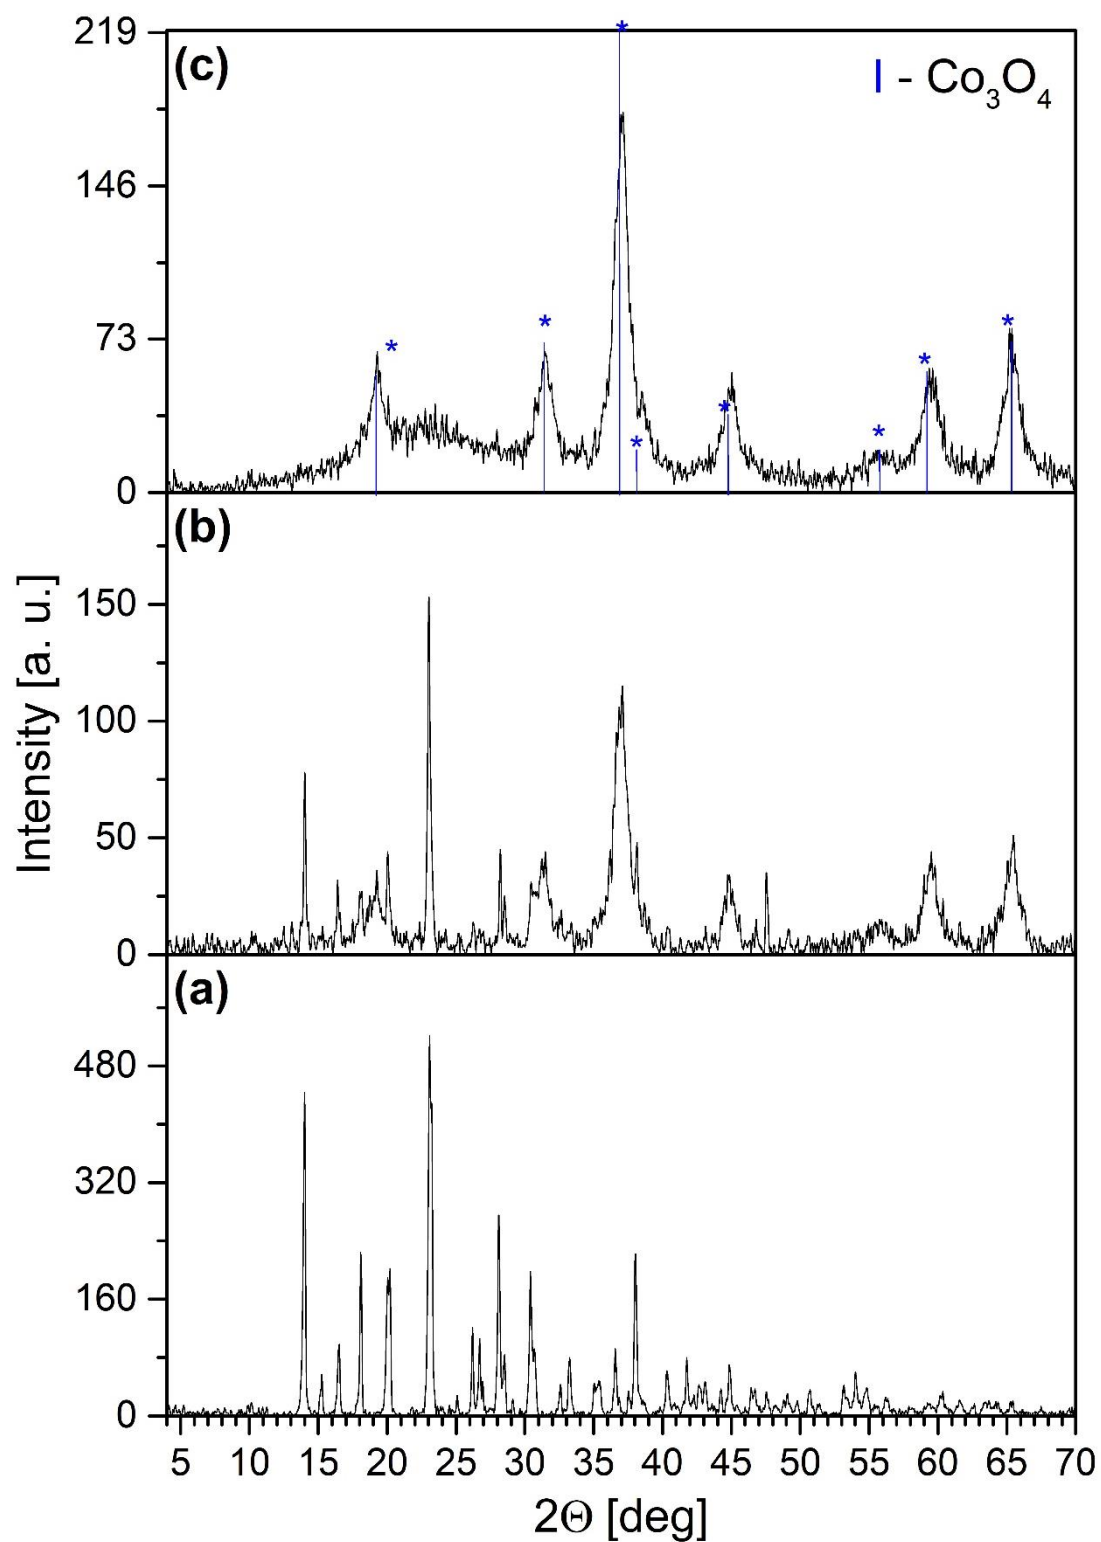

**Figure S9.** The powder-XRD of the decomposition product of compound **1** formed under isotherm conditions at around  $\sim 200^\circ\text{C}$ : **(a)** compound **1**, **(b)** decomposition product of compound **1** under isotherm conditions at around  $\sim 200^\circ\text{C}$  and **(c)** the (b) after aqueous washing.

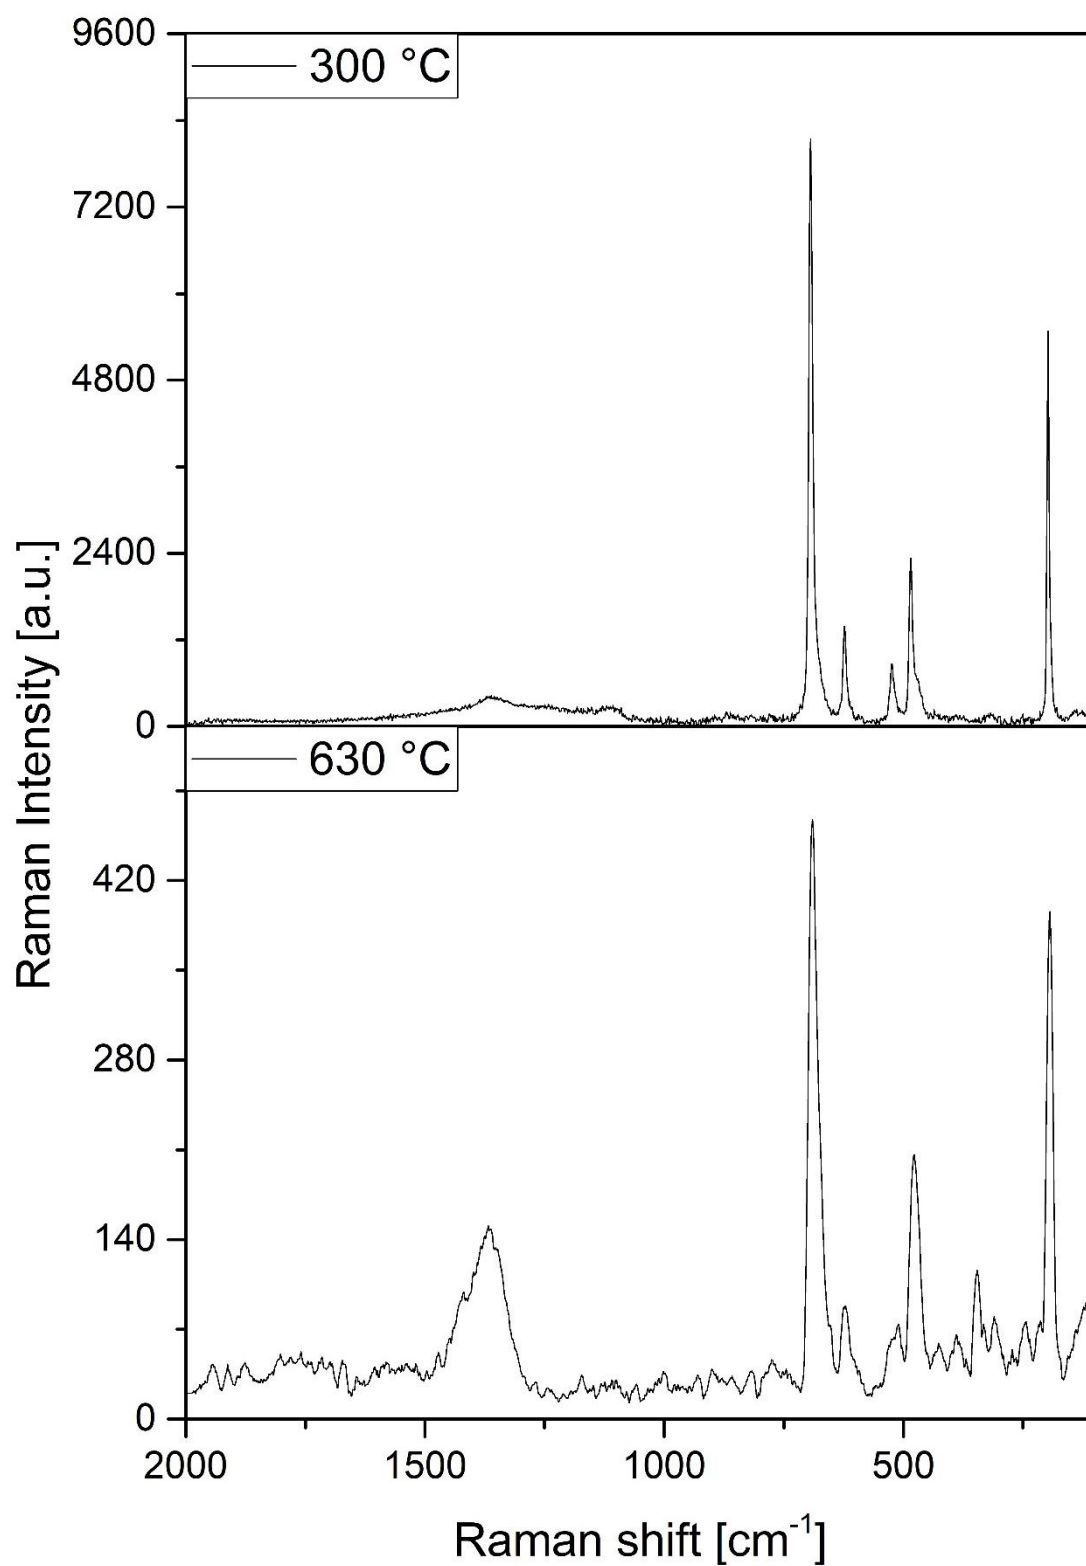

**Figure S10.** The Raman spectra of decomposition products of compound **1** formed at 300 and 630 °C in air.

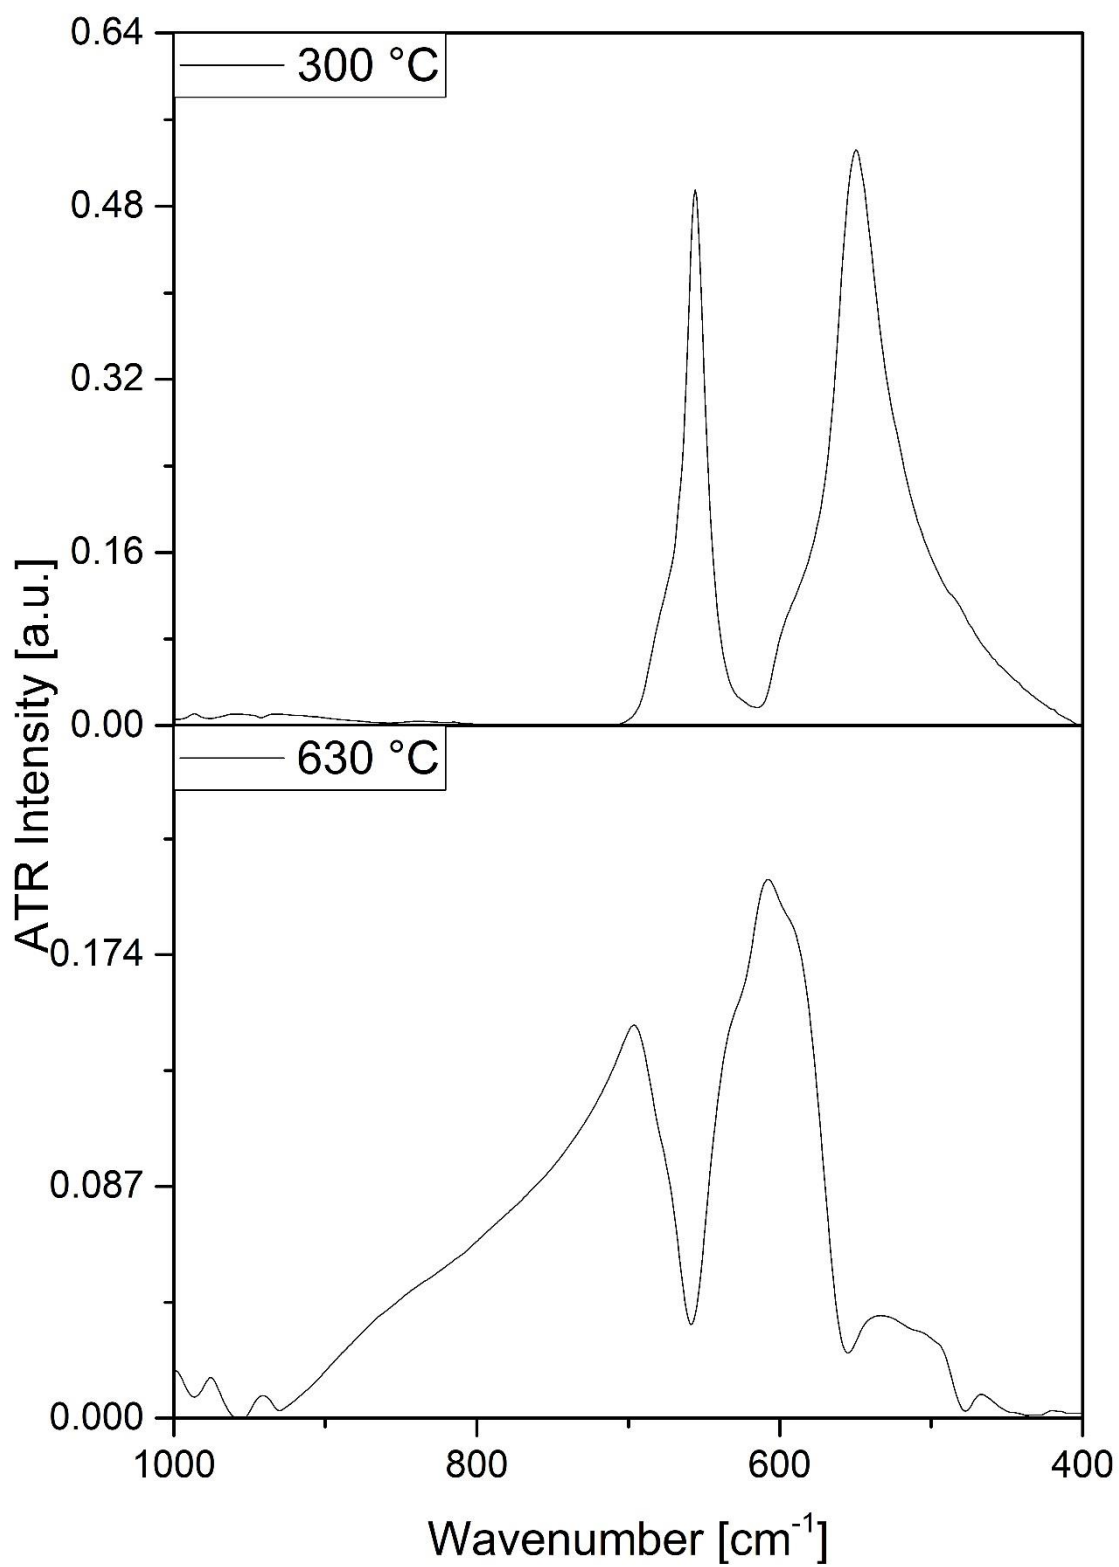

**Figure S11.** The IR spectra of decomposition products of compound **1** formed at 300 and 630 °C in inert atmosphere.
